# Supplementary material
Source: publisher figshare collection journal article supplement (https://tandf.figshare.com/ndownloader/files/17563403)
Supplement: Supplementary file 1 [file 17563403]

**Figure S3.** Egger's test for small-study effects

Number of studies = 10

| Std_Eff | Coef.     | Std. Err. | t     | P >  t | [95% Conf. Interval] |          |
|---------|-----------|-----------|-------|--------|----------------------|----------|
| slope   | .2330061  | .1376439  | 1.69  | 0.129  | -.0844014            | .5504136 |
| bias    | -.0328075 | .5880897  | -0.06 | 0.957  | -1.388945            | 1.32333  |

Test of H0: no small-study effects

p = 0.957
